# Supplementary material for: Lipophilic Toxins in Galicia (NW Spain) between 2014 and 2017: Incidence on the Main Molluscan Species and Analysis of the Monitoring Efficiency
Source: PubMed Central journal article supplement (PMC6832414; doi:10.3390/toxins11100612), 2019-10-22
Supplement: toxins-11-00612-s001.pdf [file toxins-11-00612-s001.pdf]

# Supplementary Materials: Lipophilic Toxins in Galicia (NW Spain) between 2014 and 2017: Incidence on the Main Molluscan Species and Analysis of the Monitoring Efficiency

Juan Blanco, Fabiola Arévalo, Jorge Correa and Ángeles Moroño

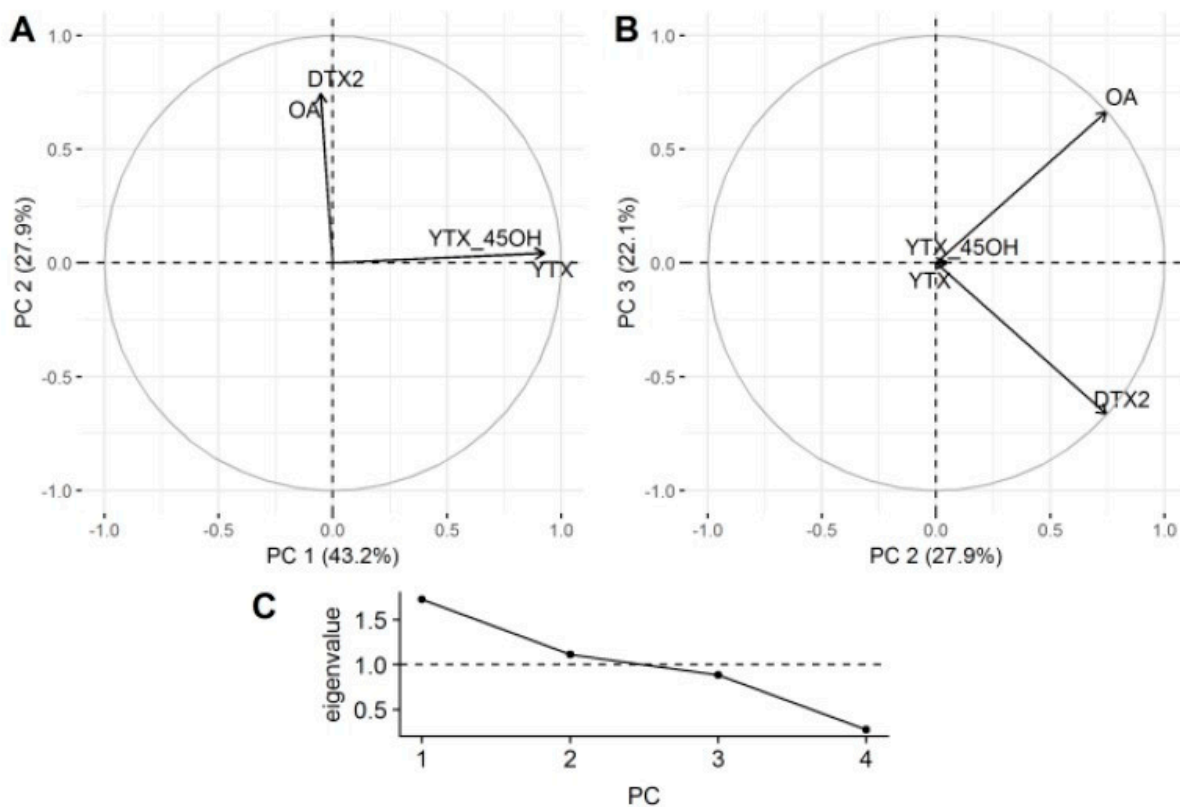

**Figure S1.** Principal component analysis of the observations using the toxins as variables.

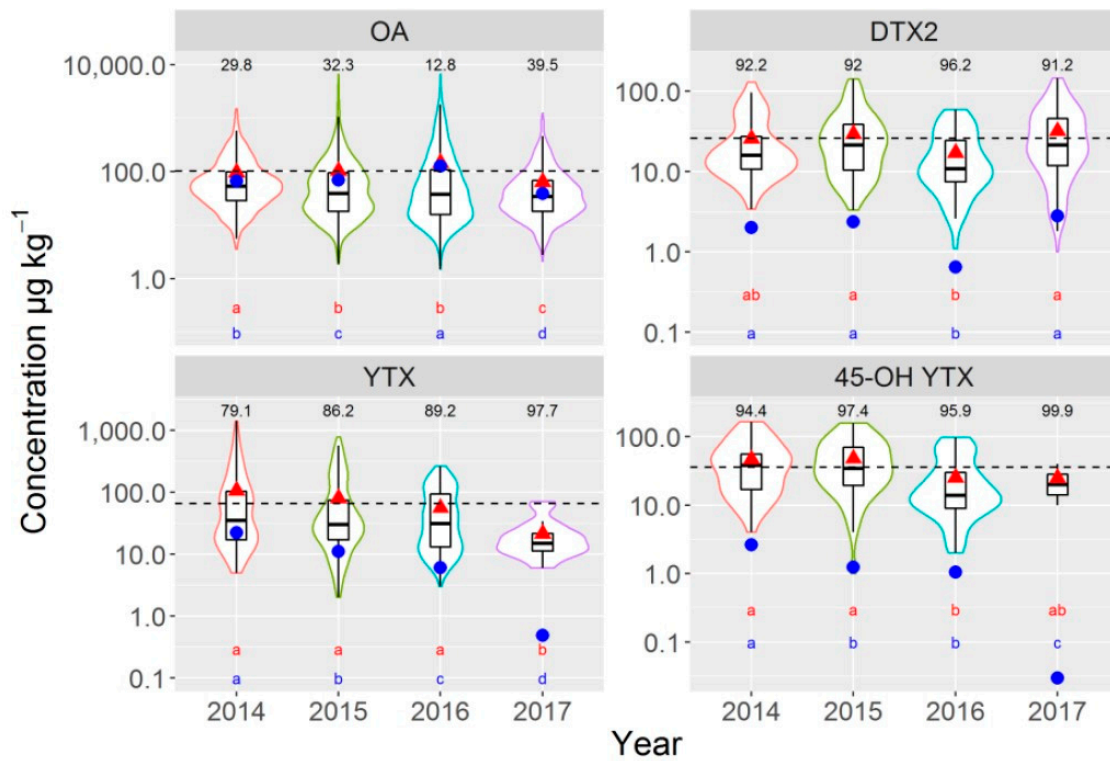

Figure S2. Violin plots of the concentration of OA, DTX2, YTX and 45-OH YTX in the four years studied.

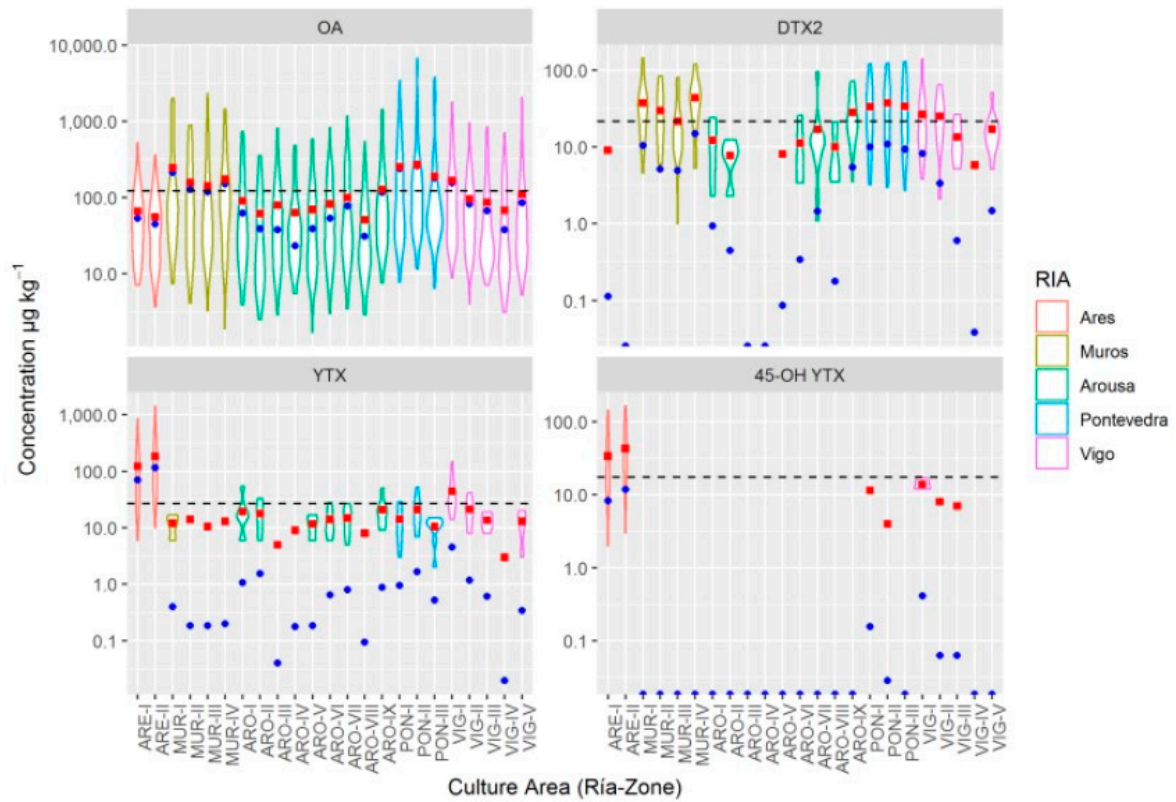

**Figure S3.** Violin plots of toxin concentrations in different mussel culture areas.

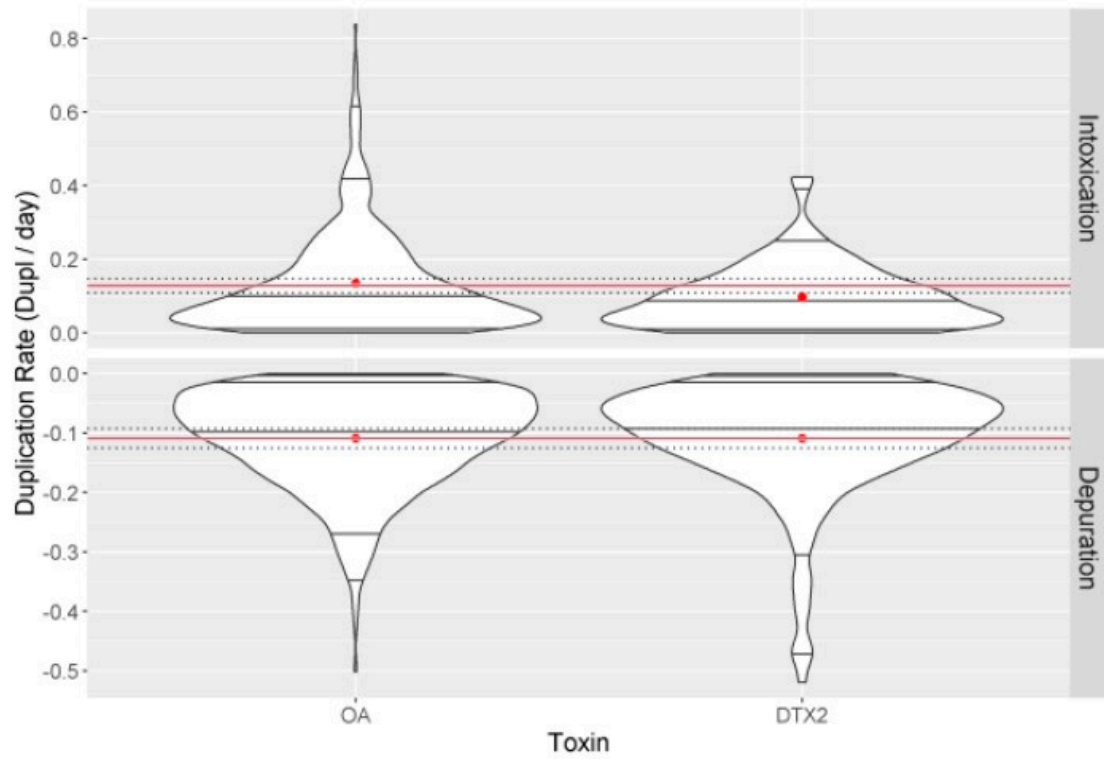

Figure S4. Violin plots of the estimated duplication rates of the toxin concentration in all the studied area.

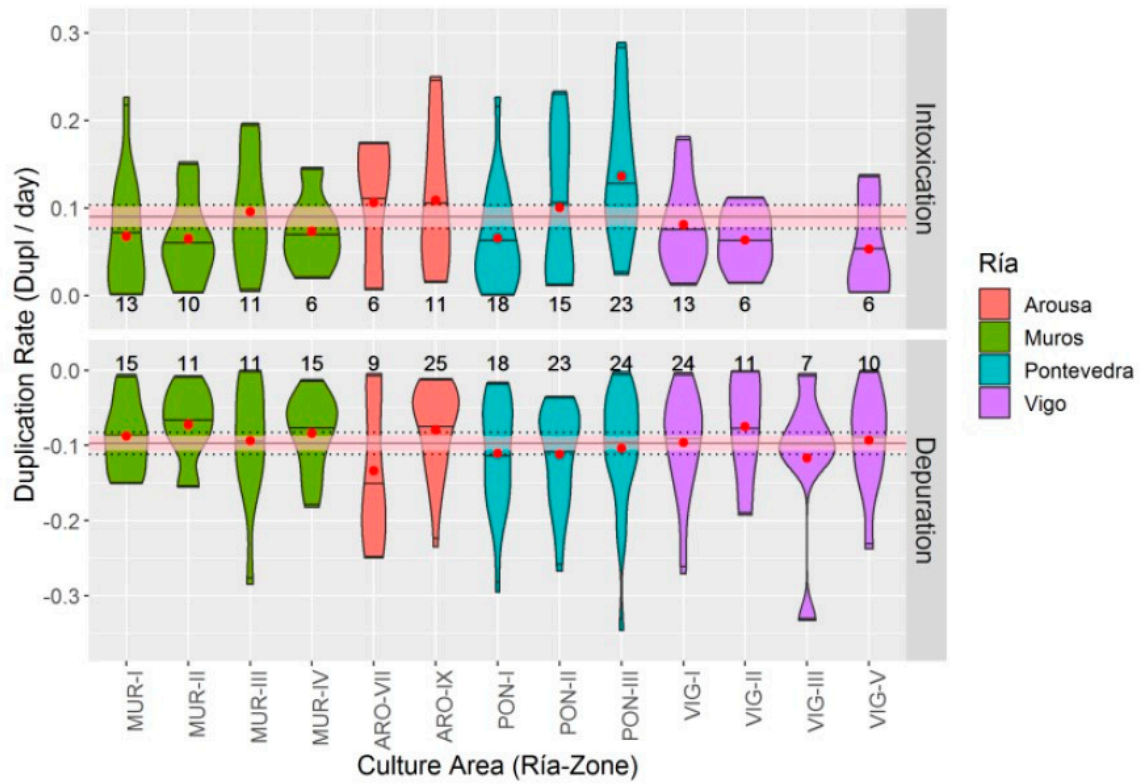

**Figure S5.** Plots of the duplication rates of DTX2 in the mussel culture areas after removing outliers.

**Table S1.** Number of samples in which all the EU regulated toxins were analysed, and numbers of samples with all toxins below and over LOD, and below and over the regulatory limit.

| Species                 | Year | N Samples | N ≥ LOD | N < LOD | ≥ Threshold | < Threshold |
|-------------------------|------|-----------|---------|---------|-------------|-------------|
| <i>V. corrugata</i>     | 2014 | 48        | 24      | 24      | 8           | 40          |
| <i>V. corrugata</i>     | 2015 | 38        | 30      | 8       | 2           | 36          |
| <i>V. corrugata</i>     | 2016 | 38        | 31      | 7       | 1           | 37          |
| <i>V. corrugata</i>     | 2017 | 36        | 12      | 24      | 1           | 35          |
| <i>R. decussatus</i>    | 2014 | 1         | 1       | 0       | 0           | 1           |
| <i>R. decussatus</i>    | 2015 | 15        | 13      | 2       | 0           | 15          |
| <i>R. decussatus</i>    | 2016 | 16        | 16      | 0       | 2           | 14          |
| <i>R. philippinarum</i> | 2014 | 45        | 30      | 15      | 2           | 43          |
| <i>R. philippinarum</i> | 2015 | 20        | 17      | 3       | 1           | 19          |
| <i>R. philippinarum</i> | 2016 | 45        | 43      | 2       | 3           | 42          |
| <i>R. philippinarum</i> | 2017 | 4         | 3       | 1       | 0           | 4           |
| <i>P. rhomboides</i>    | 2014 | 20        | 20      | 0       | 5           | 15          |
| <i>P. rhomboides</i>    | 2015 | 30        | 24      | 6       | 6           | 24          |
| <i>P. rhomboides</i>    | 2016 | 19        | 19      | 0       | 3           | 16          |
| <i>P. rhomboides</i>    | 2017 | 12        | 4       | 8       | 0           | 12          |
| <i>C. edule</i>         | 2014 | 141       | 89      | 52      | 15          | 126         |
| <i>C. edule</i>         | 2015 | 169       | 141     | 28      | 19          | 150         |
| <i>C. edule</i>         | 2016 | 214       | 193     | 21      | 27          | 187         |
| <i>C. edule</i>         | 2017 | 189       | 134     | 55      | 5           | 184         |
| <i>E. siliqua</i>       | 2014 | 5         | 3       | 2       | 0           | 5           |
| <i>E. siliqua</i>       | 2015 | 14        | 11      | 3       | 2           | 12          |
| <i>E. siliqua</i>       | 2016 | 10        | 7       | 3       | 0           | 10          |
| <i>E. siliqua</i>       | 2017 | 11        | 6       | 5       | 0           | 11          |
| wild mussel             | 2014 | 79        | 43      | 36      | 1           | 78          |
| wild mussel             | 2015 | 414       | 201     | 213     | 7           | 407         |
| wild mussel             | 2016 | 319       | 248     | 71      | 14          | 305         |
| wild mussel             | 2017 | 421       | 197     | 224     | 5           | 416         |
| raft mussel             | 2014 | 389       | 324     | 65      | 46          | 343         |
| raft mussel             | 2015 | 875       | 684     | 191     | 106         | 769         |
| raft mussel             | 2016 | 799       | 740     | 59      | 193         | 606         |
| raft mussel             | 2017 | 987       | 656     | 331     | 78          | 909         |
| <i>E. arcuatus</i>      | 2014 | 36        | 28      | 8       | 6           | 30          |
| <i>E. arcuatus</i>      | 2015 | 42        | 34      | 8       | 5           | 37          |
| <i>E. arcuatus</i>      | 2016 | 12        | 9       | 3       | 0           | 12          |
| <i>E. arcuatus</i>      | 2017 | 12        | 4       | 8       | 0           | 12          |
| <i>Ma. gigas</i>        | 2016 | 2         | 2       | 0       | 0           | 2           |
| <i>O. edulis</i>        | 2014 | 2         | 2       | 0       | 0           | 2           |
| <i>O. edulis</i>        | 2015 | 4         | 4       | 0       | 0           | 4           |
| <i>O. edulis</i>        | 2016 | 1         | 0       | 1       | 0           | 1           |
| <i>A. opercularis</i>   | 2014 | 15        | 15      | 0       | 5           | 10          |
| <i>A. opercularis</i>   | 2015 | 7         | 7       | 0       | 2           | 5           |
| <i>A. opercularis</i>   | 2017 | 5         | 5       | 0       | 0           | 5           |
| Total                   |      | 5561      | 4074    | 1487    | 570         | 4991        |
